# Supplementary material for: Molecular Cloning and Characterization of WRKY12, A Pathogen Induced WRKY Transcription Factor from Akebia trifoliata
Source: MDPI journal article supplement (doi:10.3390/genes14051015), 2023-04-29
Supplement: s1 [file s1]

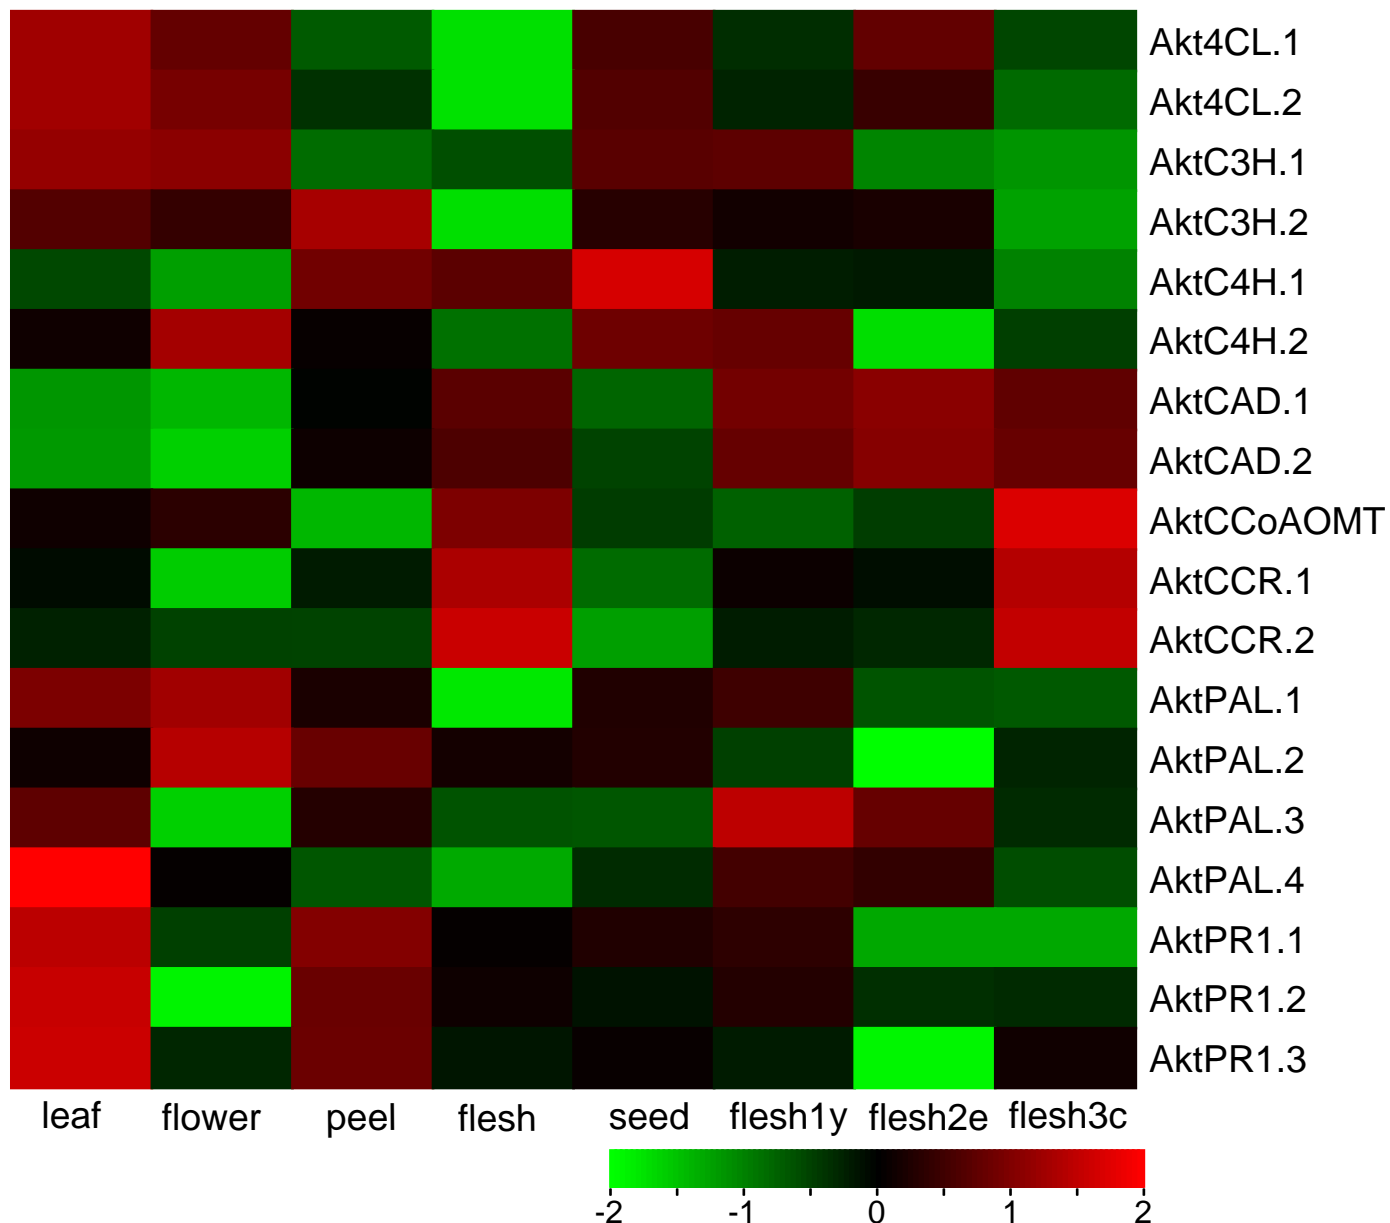

Figure S3 The expression pattern of lignin synthesis pathway key enzyme genes and PR genes of *A. trifoliata* in different tissues. flesh1y, flesh2e and flesh3c represent three different stage of fruit (young, enlargement and coloring, respectively).
