# Supplementary material for: Molecular Cloning and Characterization of WRKY12, A Pathogen Induced WRKY Transcription Factor from Akebia trifoliata
Source: MDPI journal article supplement (doi:10.3390/genes14051015), 2023-04-29
Supplement: s1 [file s1]

Table S1. The list of qRT-PCR primers of test genes.

| Gene Name          | Forward Primer         | Reverse Primer        |
|--------------------|------------------------|-----------------------|
| <i>Nt4CL</i>       | AGGGGCATGTGGTACTGTTG   | CGCCAGTGTGTAACCATCCT  |
| <i>NtC3H</i>       | CCAACAAAGTGAGGAGCCA    | TCTTCTGGGCCTTCTGCTG   |
| <i>NtC4H</i>       | AGAGGAGAAGCACGTTGAGG   | ATTGCCCCGCCTTTCTCTGTT |
| <i>NtCAD14</i>     | GGCTGCTAGAGACCCTTCTG   | TCTGGTCCTACCTCCACCAC  |
| <i>NtCCoAOMT6</i>  | CGTAATCCAAAAGGCTGGCG   | AGCCAATCACACCACCAACT  |
| <i>NtCCR</i>       | ATGTGATAACGGCAGCAGCA   | CTCCTTTCTCCCTTGCCTCG  |
| <i>NtMAPK3</i>     | ACATCCTCGCCAGCAGTTAG   | GGAGAATGGAACAGGGCAGA  |
| <i>NtMAPK6</i>     | ATACAGTCGGAGGACCAGCA   | GGGTGGCTCAAAAGGTCCAA  |
| <i>NtPAL1</i>      | ACAATCAGGGACAAGGGCAG   | GCCGACCTGTGAGTAAACCA  |
| <i>NtPR1</i>       | TTCTCATGGTCAATACGGCGA  | ACATCCAACACGAACCGAGT  |
| <i>NtUbiquitin</i> | CAGGGAAGACCATAACCCTAGA | CTCGAAGCCTCAGCACAAGA  |
| <i>AktWRKY12</i>   | GTCCCTCCCTCTCAGTCTTC   | CACCATGAATTGTTGCCATC  |
| <i>Akt18S</i>      | CGGCTACCACATCCAAGGAA   | TGTCACTACCTCCCCGTGTCA |
