# Supplementary material for: Molecular Cloning and Characterization of WRKY12, A Pathogen Induced WRKY Transcription Factor from Akebia trifoliata
Source: MDPI journal article supplement (doi:10.3390/genes14051015), 2023-04-29
Supplement: s1 [file s1]

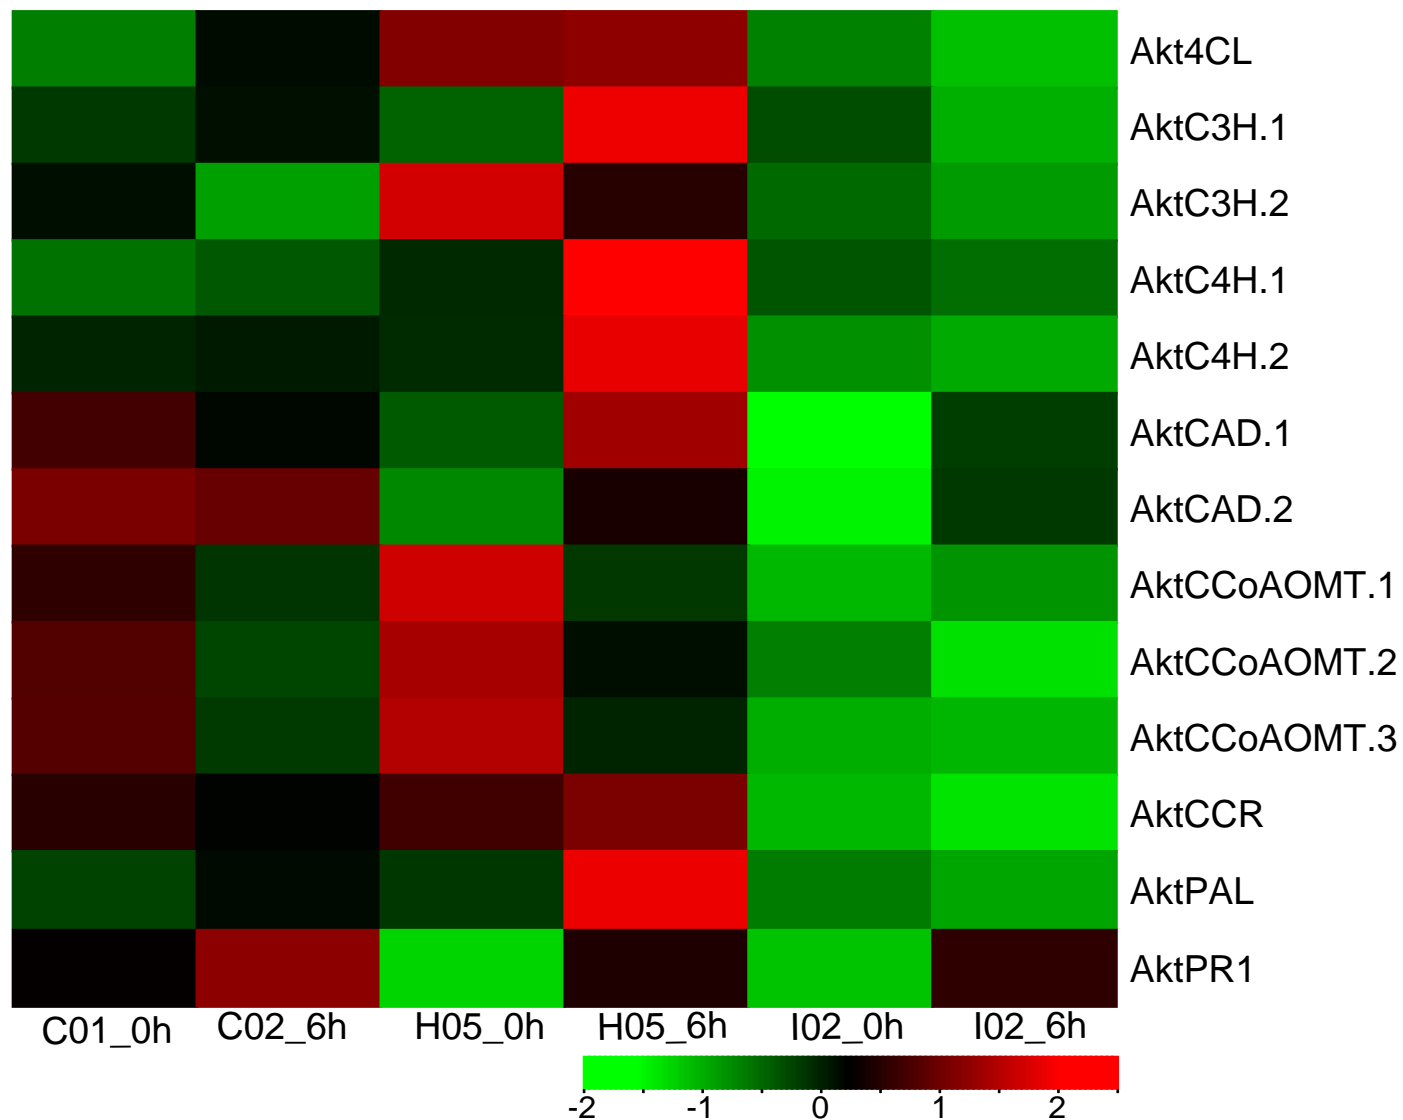

Figure S4 The expression pattern of lignin synthesis pathway key enzyme genes and PR gene in three *A. trifoliata* varieties after *C. acutatum* infection.
