# Supplementary material for: Molecular Cloning and Characterization of WRKY12, A Pathogen Induced WRKY Transcription Factor from Akebia trifoliata
Source: MDPI journal article supplement (doi:10.3390/genes14051015), 2023-04-29
Supplement: s1 [file s1]

Table S2. The coding sequence and protein sequence of AktWRKY12 in different varieties.

| Variety | Coding sequence                                                                                                                                                                                                                                                                                                                                                                                                                                                                                                                                                                                                                                                                                                         | Protein sequence                                                                                                                                                                                                                                      |
|---------|-------------------------------------------------------------------------------------------------------------------------------------------------------------------------------------------------------------------------------------------------------------------------------------------------------------------------------------------------------------------------------------------------------------------------------------------------------------------------------------------------------------------------------------------------------------------------------------------------------------------------------------------------------------------------------------------------------------------------|-------------------------------------------------------------------------------------------------------------------------------------------------------------------------------------------------------------------------------------------------------|
| H05     | ATGGAAGGAGATCGAGAAGCTTCTCGCGGTTGTTACGAGCTTGGGATCTCGTTTTCTAGTCCTCCACAAGCAATC<br>CATGAGATGGGGT <b>T</b> TGTTCAAGTTTGAAGAAAATCAGGGTTTGAGCTTCTTAGTCCCTCCCTCTCAGTCTTCTCAGG<br>TTTCTCTGTCTTTTAACAACAGCAACAACAACAACACGCTATTGGATTTAGTTGTAGCGATCTTGTGTCTAGGTC<br>TTCTTGAATAATGAACAGGTCGGAACCTTTGGATCCAAAGGTTGTTAATGATGATAATTGTACTGGTAATGTTAAC<br>GATGGCAACAATTCATGGTGGAGGAATTCATCTTCAGAGAAGAGCAAAGTAAAGGTGAGGAGGAAGCTTAGAGA<br>ACCAAGGTTTTGTTTCCAAACTAGGAGTGATGTAGATGTACTAGATGATGGTTACAAATGGAGGAAATACGGCCA<br>AAAAGTAGTCAAGAACAGTCTTCATCCAAGAAGTTATTATCGTTGCACACATAATAATTGTCGAGTGAAGAAGAG<br>GGTTGAACGATTATCTGAAGATTGTCGAATGGTGAT <b>T</b> ACGACTTATGAAGGCAGACACACCCACTCCCCTTGTGAT<br>GATTCAAATTCATCTGAACAAGAATGCTTCAGCTCATTTTAA | MEGDREASRGCYELGISFSSPPQAIHEM<br>G <b>F</b> VQFEENQGLSFLVPPSQSSQVLSFN<br>SNNNNNAIGFSCSDLVSRSSWNNEQVGT<br>LDPKVVNDNCTGNVNDGNNSWWRNS<br>SSEKSKVKVRRKLREPRFCFQTRSDVDV<br>LDDGYKWRKYGQKVVKNSLHPRSYR<br>CTHNNCRVKRVERLSEDCRMVITYE<br>GRHTHSPCDDSNSEQECFSSF* |
| C01     | ATGGAAGGAGATCGAGAAGCTTCTCGCGGTTGTTACGAGCTTGGGATCTCGTTTTCTAGTCCTCCACAAGCAATC<br>CATGAGATGGGGTATGTTCAAGTTTGAAGAAAATCAGGGTTTGAGCTTCTTAGTCCCTCCCTCTCAGTCTTCTCAGG<br>TTTCTCTGTCTTTTAACAACAGCAACAACAACAACACGCTATTGGATTTAGTTGTAGCGATCTTGTGTCTAGGTC<br>TTCTTGAATAATGAACAGGTCGGAACCTTTGGATCCAAAGGTTGTTAATGATGATAATTGTACTGGTAATGTTAAC<br>GATGGCAACAATTCATGGTGGAGGAATTCATCTTCAGAGAAGAGCAAAGTAAAGGTGAGGAGGAAGCTTAGAGA<br>ACCAAGGTTTTGTTTCCAAACTAGGAGTGATGTAGATGTACTAGATGATGGTTACAAATGGAGGAAATACGGCCA<br>AAAAGTAGTCAAGAACAGTCTTCATCCAAGAAGTTATTATCGTTGCACACATAATAATTGTCGAGTGAAGAAGAG<br>GGTTGAACGATTATCTGAAGATTGTCGAATGGTGATAACGACTTATGAAGGCAGACACACCCACTCCCCTTGTGAT<br>GATTCAAATTCATCTGAACAAGAATGCTTCAGCTCATTTTAA                   | MEGDREASRGCYELGISFSSPPQAIHEM<br>GYVQFEENQGLSFLVPPSQSSQVLSFN<br>SNNNNNAIGFSCSDLVSRSSWNNEQVGT<br>LDPKVVNDNCTGNVNDGNNSWWRNS<br>SSEKSKVKVRRKLREPRFCFQTRSDVDV<br>LDDGYKWRKYGQKVVKNSLHPRSYR<br>CTHNNCRVKRVERLSEDCRMVITYE<br>GRHTHSPCDDSNSEQECFSSF*          |
| 102     | ATGGAAGGAGATCGAGAAGCTTCTCGCGGTTGTTACGAGCTTGGGATCTCGTTTTCTAGTCCTCCACAAGCAATC<br>CATGAGATGGGGTATGTTCAAGTTTGAAGAAAATCAGGGTTTGAGCTTCTTAGTCCCTCCCTCTCAGTCTTCTCAGG<br>TTTCTCTGTCTTTTAACAACAGCAACAACAACAACACGCTATTGGATTTAGTTGTAGCGATCTTGTGTCTAGGTC<br>TTCTTGAATAATGAACAGGTCGGAACCTTTGGATCCAAAGGTTGTTAATGATGATAATTGTACTGGTAATGTTAAC<br>GATGGCAACAATTCATGGTGGAGGAATTCATCTTCAGAGAAGAGCAAAGTAAAGGTGAGGAGGAAGCTTAGAGA<br>ACCAAGGTTTTGTTTCCAAACTAGGAGTGATGTAGATGTACTAGATGATGGTTACAAATGGAGGAAATACGGCCA<br>AAAAGTAGTCAAGAACAGTCTTCATCCAAGAAGTTATTATCGTTGCACACATAATAATTGTCGAGTGAAGAAGAG<br>GGTTGAACGATTATCTGAAGATTGTCGAATGGTGATAACGACTTATGAAGGCAGACACACCCACTCCCCTTGTGAT<br>GATTCAAATTCATCTGAACAAGAATGCTTCAGCTCATTTTAA                   | MEGDREASRGCYELGISFSSPPQAIHEM<br>GYVQFEENQGLSFLVPPSQSSQVLSFN<br>SNNNNNAIGFSCSDLVSRSSWNNEQVGT<br>LDPKVVNDNCTGNVNDGNNSWWRNS<br>SSEKSKVKVRRKLREPRFCFQTRSDVDV<br>LDDGYKWRKYGQKVVKNSLHPRSYR<br>CTHNNCRVKRVERLSEDCRMVITYE<br>GRHTHSPCDDSNSEQECFSSF*          |
