# Supplementary figures and images for: Molecular Cloning and Characterization of WRKY12, A Pathogen Induced WRKY Transcription Factor from Akebia trifoliata
Source: MDPI journal article supplement (doi:10.3390/genes14051015), 2023-04-29

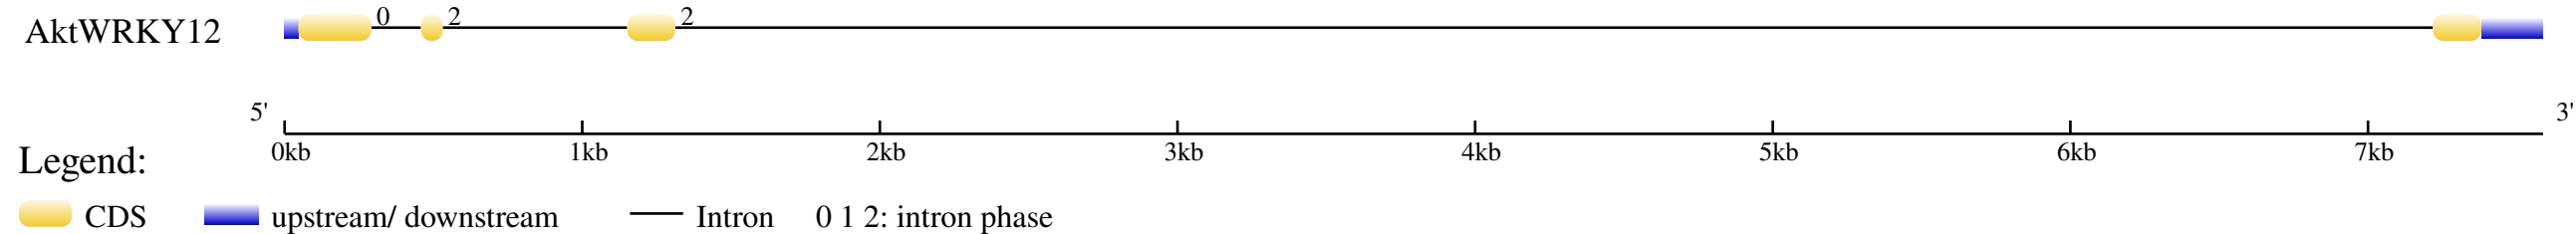

Figure S1 The gene structure of AktWRKY12.

Supplement: s1 [file s1]
